# Supplementary material for: Six-Month Pulmonary Function After Venovenous Extracorporeal Membrane Oxygenation for Coronavirus Disease 2019 Patients
Source: PubMed Central journal article supplement — Crit Care Explor. 2021 Jul 16;3(7):e0494. doi: 10.1097/CCE.0000000000000494 (PMC8288889; doi:10.1097/cce.0000000000000494), 2021-07-16
Supplement: cc9-3-e0494-s001.pdf [file cc9-3-e0494-s001.pdf]

**Table 1.** Main characteristics of the included patients.

| P  | Age | BMI  | SAPS-3 | MV before ECMO (d) | PaO <sub>2</sub> /FiO <sub>2</sub> pre-ECMO | Compliance pre-ECMO ml/cmH <sub>2</sub> O | Days of ECMO | Total Days of MV | Admission to EFR (d) | ECMO weaning to EFR (days) |
|----|-----|------|--------|--------------------|---------------------------------------------|-------------------------------------------|--------------|------------------|----------------------|----------------------------|
| 1  | 34  | 44   | 55     | 0                  | 60                                          | 20                                        | 15           | 26               | 109                  | 94                         |
| 2  | 49  | 32   | 48     | 7                  | 80                                          | 26                                        | 5            | 20               | 102                  | 97                         |
| 3  | 54  | 27   | 58     | 5                  | 60                                          | 25                                        | 15           | 24               | 178                  | 163                        |
| 4  | 56  | 34   | 69     | 6                  | 90                                          | 30                                        | 15           | 37               | 232                  | 211                        |
| 5  | 60  | 29   | 56     | 22                 | 80                                          | 21                                        | 23           | 49               | 198                  | 147                        |
| 6  | 60  | 33   | 43     | 4                  | 66                                          | 32                                        | 11           | 21               | 72                   | 55                         |
| 7  | 38  | 30   | 39     | 4                  | 44                                          | 38                                        | 18           | 30               | 211                  | 188                        |
| 8  | 61  | 26   | 45     | 1                  | 47                                          | 30                                        | 39           | 50               | 143                  | 98                         |
| 9  | 56  | 26   | 43     | 12                 | 50                                          | 17                                        | 8            | 23               | 188                  | 168                        |
| 10 | 51  | 40.5 | 53     | 6                  | 63                                          | 28                                        | 16           | 45               | NA                   | NA                         |
| 11 | 52  | 29,2 | 43     | 3                  | 48                                          | 26                                        | 8            | 17               | NA                   | NA                         |

| P  | FVC, L<br>(% P) | TLC, L<br>(% P) | RV, L<br>(% P) | FEV1, L<br>(% P) | FEV1/FVC | DLCO<br>ml/min/mmHg<br>(% P) | DLCO/VA<br>ml/min/mmHg/L<br>(% P) | 6 MWT, m<br>(% P) | SpO <sub>2</sub> rest<br>% | SpO <sub>2</sub> effort<br>% |
|----|-----------------|-----------------|----------------|------------------|----------|------------------------------|-----------------------------------|-------------------|----------------------------|------------------------------|
| 1  | 3.09 (84)       | 4.75 (90)       | 1.66 (106)     | 2.6 (82)         | 85       | 13.82 (49)                   | 3.84 (73)                         | 455 (69)          | 97%                        | 95%                          |
| 2  | 2.55 (99)       | 4.44 (105)      | 1.83 (119)     | 2.2 (99)         | 83       | 14.87 (69)                   | 4.26 (83)                         | 380 (63)          | NA                         | NA                           |
| 3  | 2.61 (66)       | 5.01 (80)       | 1.69 (84)      | 2.3 (72)         | 88       | 12.63 (45)                   | 3.37 (75)                         | 485 (66)          | 98%                        | 96%                          |
| 4  | 2.6 (62)        | 5.44 (81)       | 2.73 (120)     | 2.43 (73)        | 92       | 14.65 (52)                   | 4.55 (108)                        | 625 (89)          | 96%                        | 91%                          |
| 5  | 2.43 (59)       | 3.95 (58)       | 1.38 (58)      | 2.2 (68)         | 92       | 16.11 (58)                   | 4.28 (105)                        | 480 (70)          | 95%                        | 91%                          |
| 6  | 3.2 (90)        | 4.99 (88)       | 1.82 (83)      | 2.6 (94)         | 82       | 19.37 (89)                   | 4.45 (89)                         | NA                | 98%                        | NA                           |
| 7  | 4.16 (83)       | 6.56 (96)       | 2.3 (121)      | 3.6 (87)         | 85       | 21.63 (72)                   | 5.3 (83)                          | 365 (75)          | 95%                        | 92%                          |
| 8  | 2.16 (51)       | 3.29 (49)       | 1.3 (53)       | 2.0 (60)         | 91       | 9.38 (37)                    | 3.28 (54)                         | NA                | 96%                        | NA                           |
| 9  | 4.49 (86)       | 6.99 (104)      | 3.26 (144)     | 3.5 (97)         | 77       | 8.95 (95)                    | 1.47 (92)                         | NA                | 97%                        | NA                           |
| 10 | NA              | NA              | NA             | NA               | NA       | NA                           | NA                                | NA                | NA                         | NA                           |
| 11 | NA              | NA              | NA             | NA               | NA       | NA                           | NA                                | NA                | 96%                        | NA                           |

P = patient; BMI = body mass index; SAPS = Simplified Acute Physiology Score; MV = mechanical ventilation; d = days; P = predicted value;

FVC = Forced Vital Capacity; TLC = Total Lung Capacity; RV = Residual Volume; FEV = Forced Expiratory Volume; DLCO = Diffusing

Capacity Of The Lungs For Carbon Monoxide; VA = alveolar volume; SpO<sub>2</sub> = peripheral oxygen saturation; 6MWT = 6-minute walking test
